# Supplementary material for: FeP–Fe3O4 nanospheres for electrocatalytic N2 reduction to NH3 under ambient conditions
Source: Royal Society of Chemistry journal article supplement (doi:10.1039/d3cc04897g), 2024-01-01
Supplement: d3cc04897g1.pdf [file d3cc04897g1.pdf]

## Supporting Information

### **Ambient N<sub>2</sub> reduction to NH<sub>3</sub> electrocatalyzed by FeP-Fe<sub>3</sub>O<sub>4</sub> nanospheres**

Huanhuan Zhang <sup>‡a</sup>, Shuhao Yan <sup>‡f</sup>, Wei Yi <sup>c\*</sup>, Yebo Lu <sup>b\*</sup>, Xiao Ma <sup>a</sup>, Yu Bin <sup>a</sup>, Lanhua Yi <sup>a\*</sup>, Xingzhu Wang <sup>d,e\*</sup>

<sup>a</sup> Key Laboratory of Environmentally Friendly Chemistry and Applications of Ministry of Education, School of Chemistry, Xiangtan University, Xiangtan 411105, PR China

<sup>b</sup> College of Information Science and Engineering, Jiaying University, Jiaying 314001, PR China

<sup>c</sup> School of Biology and Chemistry, Minzu Normal University of Xingyi, Xingyi 562400, PR China

<sup>d</sup> School of Electrical Engineering, University of South China, Hengyang 421001, PR China

<sup>e</sup> Department of Materials Science and Engineering, Southern University of Science and Technology, Shenzhen 518055, PR China

<sup>f</sup> National Center for Nanoscience and Technology, Beijing 100190, PR China

\* Corresponding authors.

E-mail addresses: yiwei@xynun.edu.cn (W. Yi), luyebo@zjxu.edu.cn (Y. Lu), yilanhua@xtu.edu.cn (L. Yi), wangxz@sustech.edu.cn (X. Wang)

<sup>‡</sup> These authors contributed equally to this work.

## Experimental section

$\text{Fe}(\text{NO}_3)_3 \cdot 9\text{H}_2\text{O}$  (purity 98.5%) and  $\text{Na}_2\text{SO}_4$  (purity 97%) were purchased from Xilong Scientific Co., Ltd.  $\text{NaNO}_3$  (purity 99%) was purchased from J&K Scientific,  $\text{NH}_4\text{Cl}$  (AR),  $\text{CH}_3\text{CH}_2\text{OH}$  (purity 99%),  $\text{CH}_3\text{CN}$  (purity 99%),  $\text{C}_3\text{H}_8\text{O}$  (purity 99%) were purchased from sino-pharm,  $\text{NaH}_2\text{PO}_2 \cdot \text{H}_2\text{O}$  (purity 98%) was purchased from Fuchen Tianjin Chemical Reagent Co., Ltd.  $\text{NaClO}$  (50 wt.% aq.),  $p\text{-C}_9\text{H}_{11}\text{NO}$  (AR) were purchased from Shanghai Aladdin Biochemical Technology Co., Ltd.  $\text{C}_7\text{H}_5\text{O}_3\text{Na}$  (purity 99.5%), Nafion 117 mixture solution (5wt.%),  $\text{C}_5\text{H}_4\text{FeN}_6\text{Na}_2\text{O}_3$  (purity 99%),  $\text{N}_2\text{H}_4 \cdot \text{H}_2\text{O}$  (80 wt.%), were purchased from Beijing InnoChem,  $\text{N}_2$  (purity 99.999%),  $\text{Ar}$  (purity 99.999%),  $\text{Ar}$  and  $\text{H}_2$  ( $\text{Ar} + 5\% \text{H}_2$ ) were purchased from Beijing Millennium Capital Gas Co., Ltd. All chemicals were used as received without further purification. Deionized water was used throughout the experiments.

**Synthesis of  $\text{Fe}_2\text{O}_3$  nanospheres.** Preparation of  $\text{Fe}_2\text{O}_3$  using a one-step solvothermal process: Ferric nitrate nonahydrate (1.55 g, 3.84 mmol) and sodium nitrate (1.0g, 11.76 mmol) were mixed in a binary solution containing 18 mL of ultrapure water and 30 mL of anhydrous ethanol. The resulting mixture was irradiated in an ultrasonic bath for 5 min at room temperature followed by magnetically stirring until a yellow clear solution was formed. To this mixture, 24 mL of acetonitrile was added and it was stirred for additional 30 min. The resulting solution was transferred to the inner lining of 100 mL reactor. The reactor was then placed in an oven and heated at  $180^\circ\text{C}$  for 16 h. After cooling to room temperature, it was centrifuged and the solid was washed 5mL acetonitrile, 5mL ultra-pure water, and 5 mL anhydrous ethanol, three

times each. The read solid was dried under vacuum at 80°C for 12 hours.<sup>1</sup>

**Synthesis of FeP-Fe<sub>3</sub>O<sub>4</sub> and Fe<sub>3</sub>O<sub>4</sub>.** FeP-Fe<sub>3</sub>O<sub>4</sub> was prepared by a one-step thermal reduction method, and a brief description of the preparation method is as follow: Ground powdered Fe<sub>2</sub>O<sub>3</sub> (100 mg, 0.625 mmol) was placed on one end of a quartz porcelain boat and sodium hypophosphite (500 mg, 5.68 mmol) powder was placed on the other end of the boat. The quartz porcelain boat was heated at 400°C for 2 h in Ar. After cooling to room temperature, the obtained black powder was FeP-Fe<sub>3</sub>O<sub>4</sub>. The Fe<sub>3</sub>O<sub>4</sub> was obtained from ground powdered Fe<sub>2</sub>O<sub>3</sub> (100 mg, 0.625 mmol) in the absence of sodium hypophosphite by applying 5% H<sub>2</sub>/Ar. The working electrodes loaded with FeP-Fe<sub>3</sub>O<sub>4</sub> and Fe<sub>3</sub>O<sub>4</sub> catalysts on carbon paper (CP) were recorded as FeP-Fe<sub>3</sub>O<sub>4</sub>/CP and Fe<sub>3</sub>O<sub>4</sub>/CP, respectively.<sup>2,3</sup>

**Characterizations.** X-ray diffraction (XRD) study was carried out on a D/MAX-TTRIII (CBO) with Cu K $\alpha$  radiation ( $\lambda = 1.542 \text{ \AA}$ ). Scanning electron microscopy (SEM) was performed using a Hitachi S4800 scanning electron microscope. Transmission electron microscopy (TEM) and selected area electron diffraction (SAED) studies were performed using a Tecnai G2 F20 S-TWIN. High-angle annular dark field scanning transmission electron microscopy (HAADF-STEM) imaging and energy-dispersive X-ray spectrometer (EDS) elemental mapping were conducted on a JEM-ARM 200F. X-ray photoelectron spectroscopy (XPS) was conducted using an ESCALAB 20 Xi XPS system. Ultraviolet-visible (UV-vis) spectra were carried out on a SHIMADZU UV-2700 UV-vis spectrophotometer. The BET analysis was performed with a specific surface area and porosity analyzer model ASAP 2420-4 for nitrogen

adsorption and desorption experiments. The degassing treatment temperature was 200°C and the isothermal curve testing temperature was -196°C.

**Electrochemical Measurements.** The Shanghai Chenhua CHI660E electrochemical workstation with three-electrode system was used for all electrochemical tests in this work. The H-type electrolytic cell was chosen as the reaction device, in which the as-prepared FeP-Fe<sub>3</sub>O<sub>4</sub> or CP was used as the working electrode (WE), a Hg/HgO electrode was used as reference electrode (RE) under alkaline conditions, Pt sheet electrode was used as the counter electrode (CE), and a Nafion 211 membrane was used to separate the cathode and anode. Ultra-pure N<sub>2</sub> (99.999%) or Ar (99.999%) was continuously passed into the electrolyte for at least 30 min before each test. The potentials were converted to RHE values by [Eq. 1](#)

$$E_{(\text{vs. RHE})} = E_{(\text{vs. Hg/HgO})} + 0.059 \times \text{pH} + 0.098 \text{ V} \quad (1)$$

**Determination of NH<sub>3</sub>.** The salicylic acid method was used for the determination of NH<sub>3</sub> concentration.<sup>4</sup> The standard linear fitting equation of the method was obtained by calibration of a series of solutions with known concentrations of NH<sub>4</sub>Cl to ensure a good linearity ([Fig. S1](#)). The electrolyte was 0.1 M KOH + 0.1 M K<sub>2</sub>SO<sub>4</sub> solution, and the standard linear fitting equation was  $y = 0.4174x + 0.027$ ,  $R^2 = 0.998$ , where x is NH<sub>4</sub><sup>+</sup> concentration, y is absorbance.

**Determination of N<sub>2</sub>H<sub>4</sub>.** The Watt and Chrisp method was used to assay the hydrazine hydrate concentration.<sup>5</sup> The standard linear fitting equation for the method was obtained by calibrating a series of solutions with known concentrations of hydrazine hydrate to ensure a good linearity ([Fig. S2](#)). The electrolyte was a mixture of

0.1 M KOH + 0.1 M K<sub>2</sub>SO<sub>4</sub> solution, and the standard linear fitting equation was  $y = 0.1078x + 0.0348$ ,  $R^2 = 0.998$ , where x is N<sub>2</sub>H<sub>4</sub> concentration, y is absorbance.

## Graphics

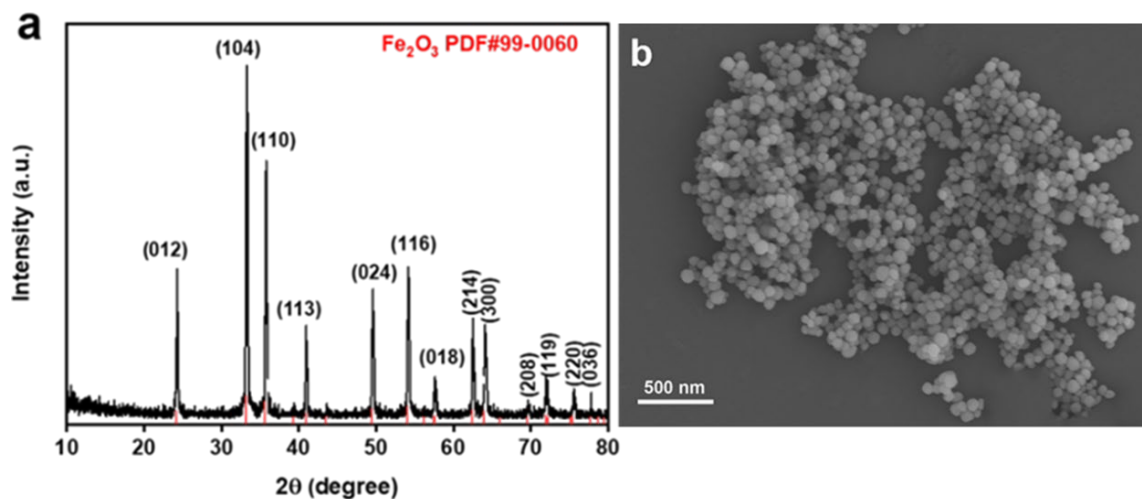

**Fig. S1.** (a) XRD pattern and (b) SEM images of Fe<sub>2</sub>O<sub>3</sub> precursor.

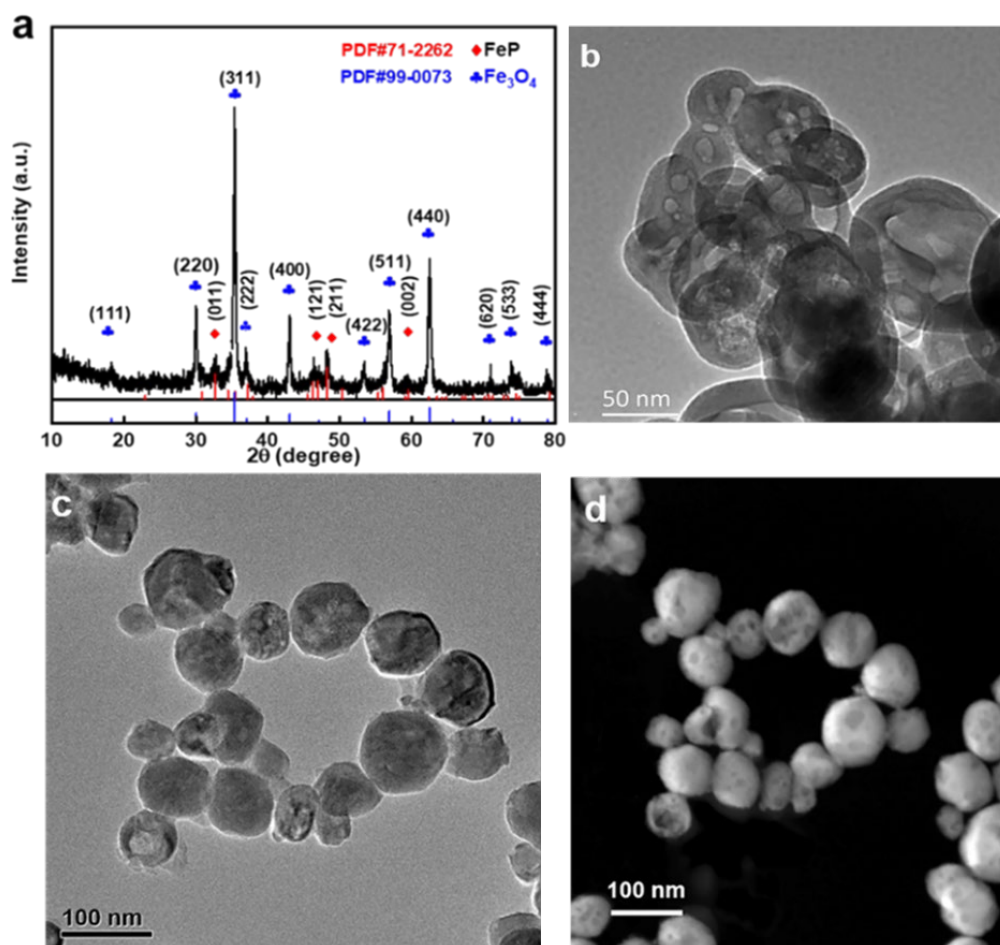

**Fig. S2.** (a) XRD pattern, (b-c) TEM images, (d) HAADF-STEM images of FeP-Fe<sub>3</sub>O<sub>4</sub>.

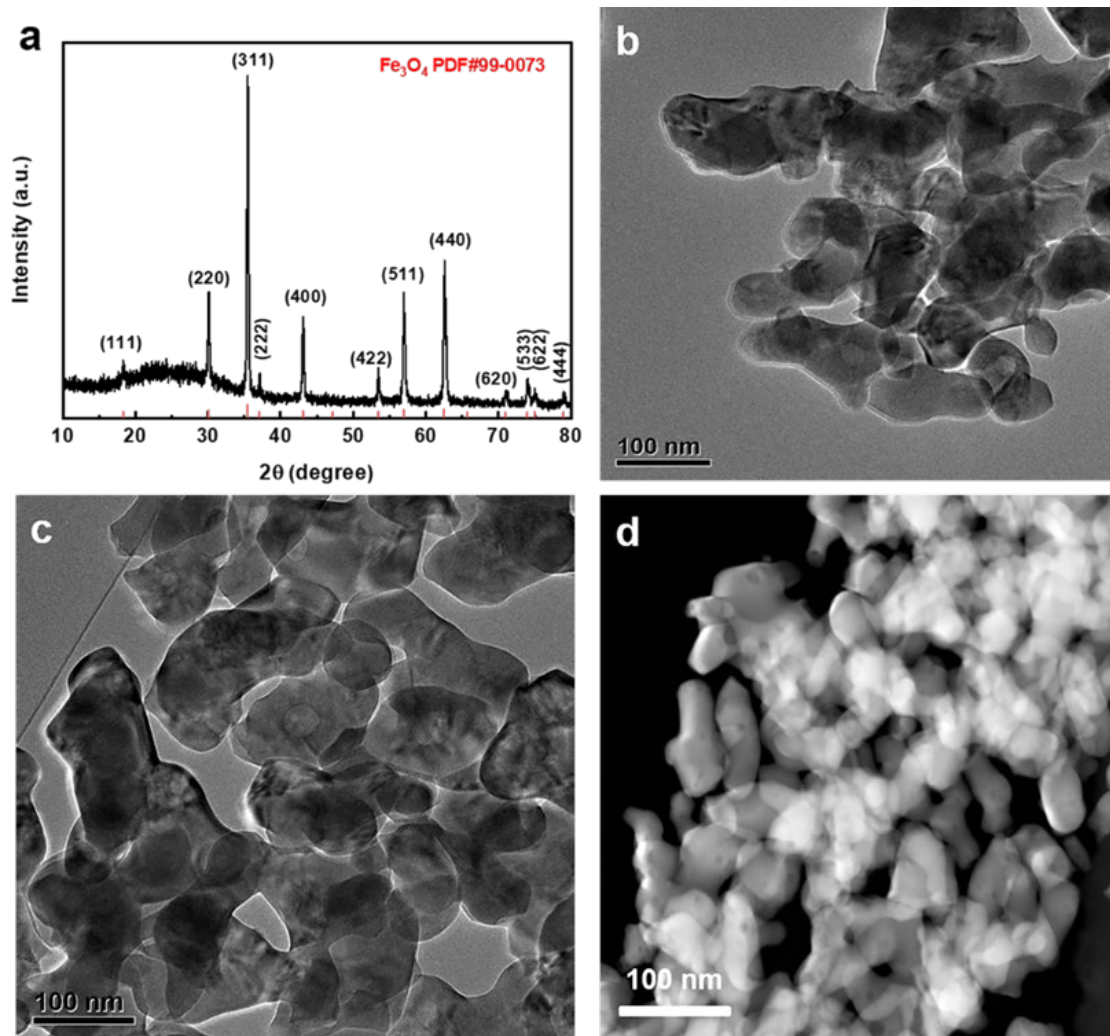

Fig. S3. (a) XRD pattern, (b-c) TEM images, (d) HAADF-STEM images of Fe<sub>3</sub>O<sub>4</sub>.

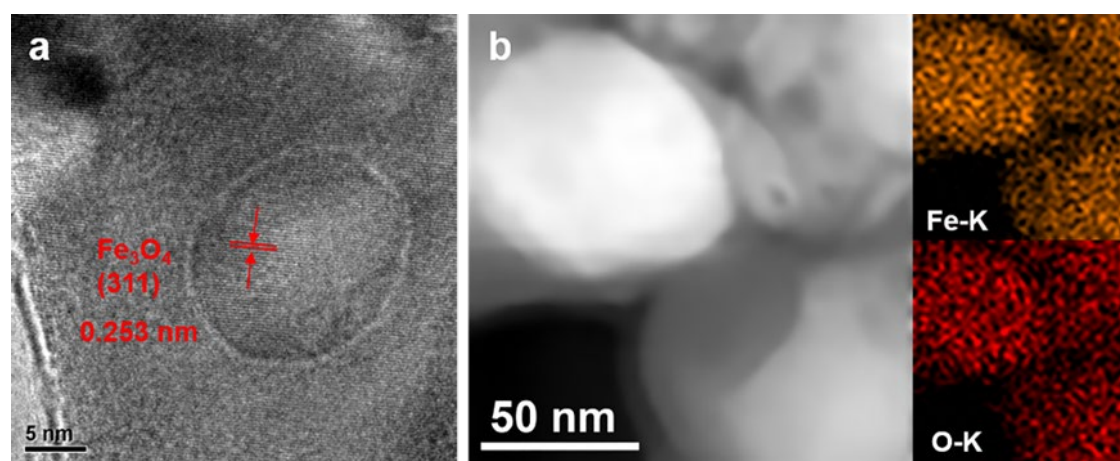

Fig. S4. (a) HRTEM image, (b) HAADF-STEM image and corresponding EDS element distribution map of Fe<sub>3</sub>O<sub>4</sub>.

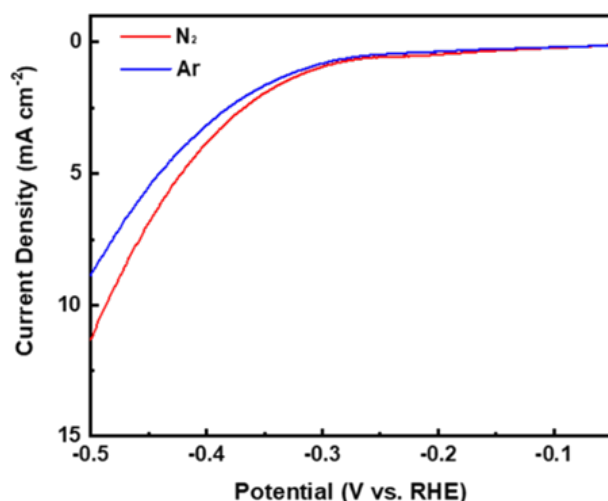

**Fig. S5.** LSV curves of FeP-Fe<sub>3</sub>O<sub>4</sub> in the electrolyte at N<sub>2</sub> (red curve) saturation and Ar (blue curve) saturation at scanning rate of 10 mV s<sup>-1</sup>.

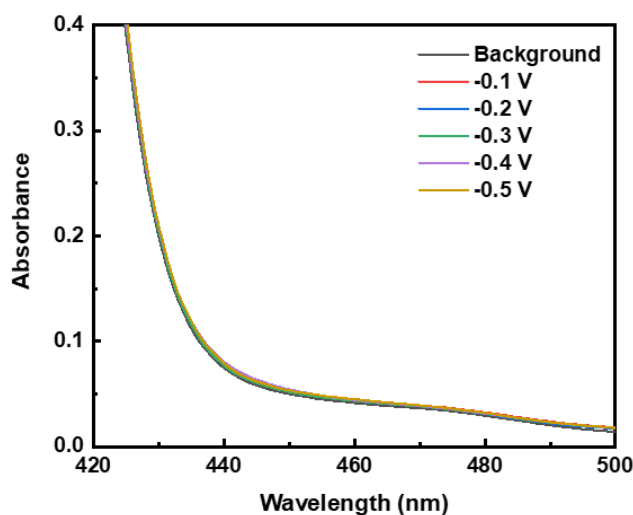

**Fig. S6.** UV-vis absorption results of 0.1M KOH + 0.1M K<sub>2</sub>SO<sub>4</sub> electrolyte dyed with p-C<sub>9</sub>H<sub>11</sub>NO indicator for Fe-Fe<sub>3</sub>O<sub>4</sub> before and after electrolysis at different potentials for 2 h.

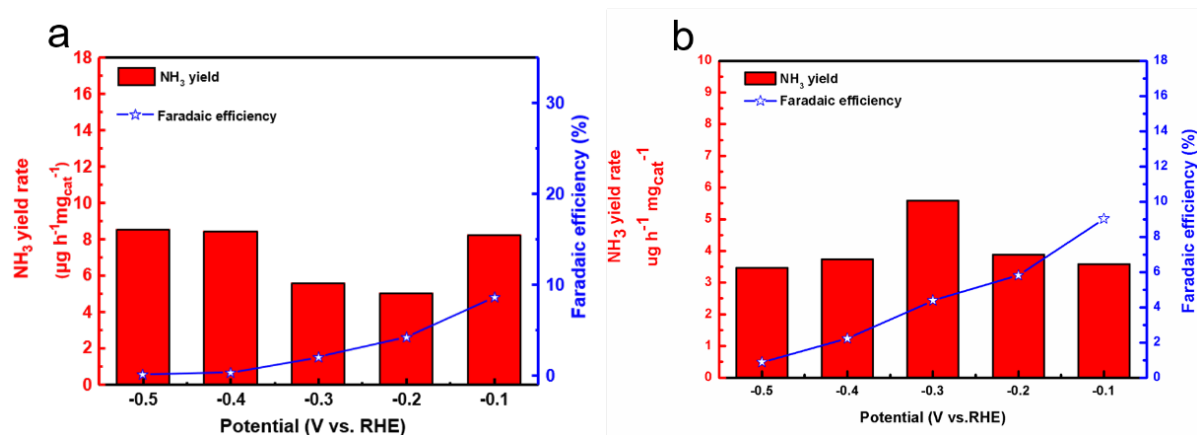

**Fig. S7.** NH<sub>3</sub> yield and Faraday efficiency of Fe<sub>3</sub>O<sub>4</sub> (a) and Fe<sub>2</sub>O<sub>3</sub> (b) in N<sub>2</sub>-saturated electrolyte at different potentials.



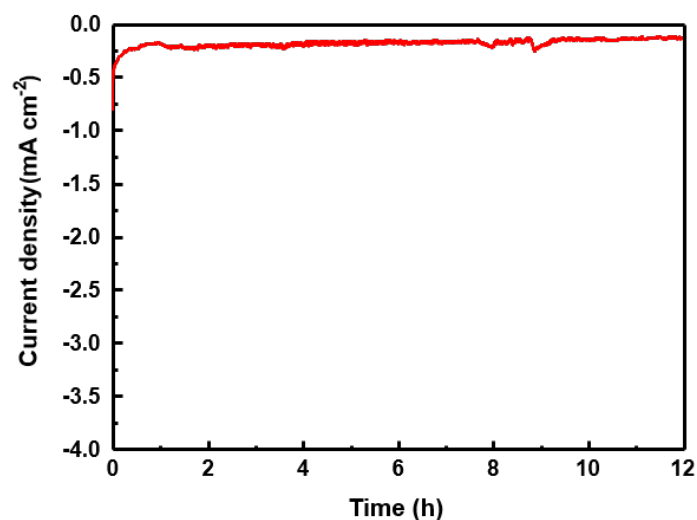

Fig. S8. Current density of FeP-Fe<sub>3</sub>O<sub>4</sub> over time 12 h at -0.1 V.

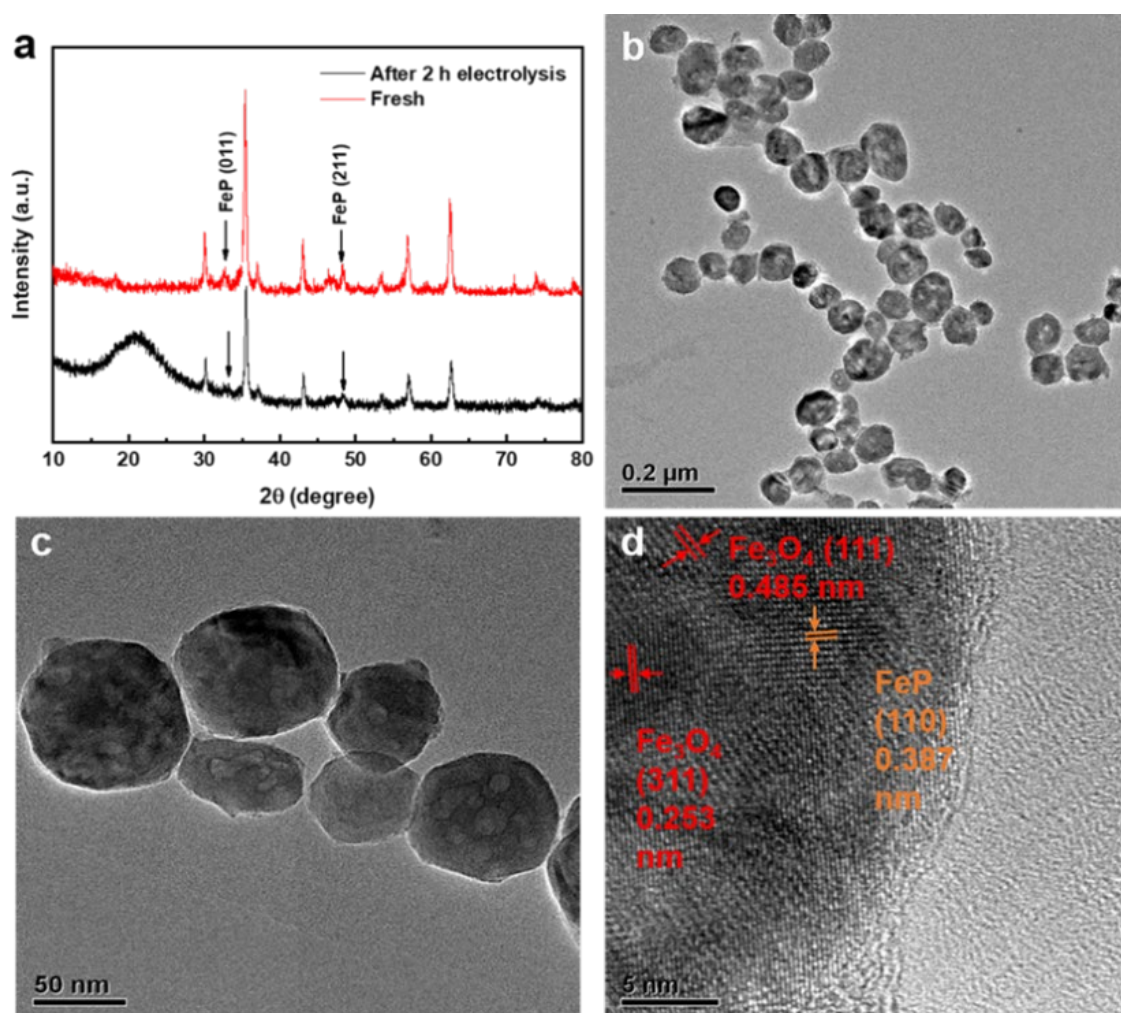

Fig. S9. (a) XRD comparison of FeP-Fe<sub>3</sub>O<sub>4</sub> before and after 2 h eNRR test at -0.1 V, (b-c) TEM and (d) HR-TEM images of FeP-Fe<sub>3</sub>O<sub>4</sub> after 2 h eNRR test at -0.1 V.



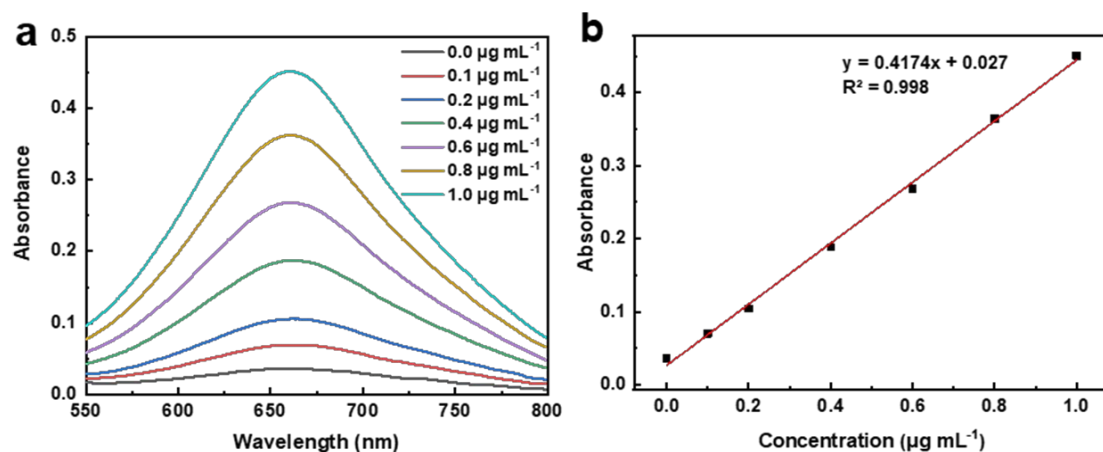

**Fig. S10.** (a) UV-vis absorption spectra of the electrolytes with various  $\text{NH}_4^+$  concentrations after incubation in dark for 2 h, (b) The corresponding calibration curve utilized to determine  $\text{NH}_3$ .

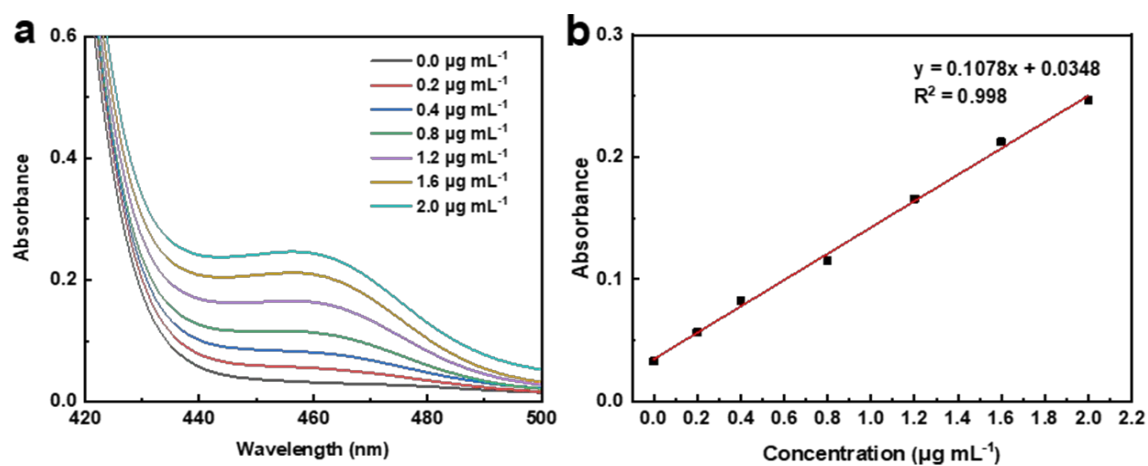

**Fig. S11.** (a) UV-vis absorption spectra of the electrolytes with various concentration of  $\text{N}_2\text{H}_4$ , (b) The corresponding calibration curve utilized to determine  $\text{N}_2\text{H}_4$ .

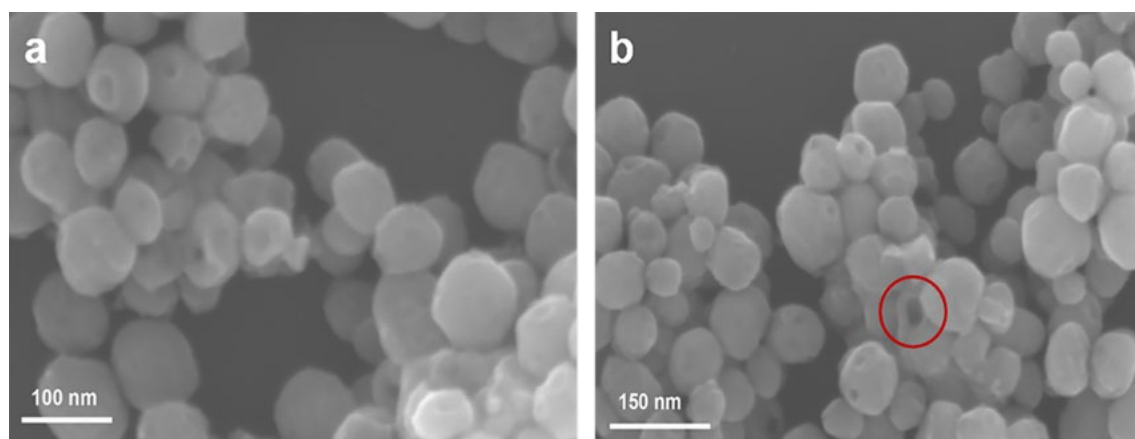

**Fig. S12.** SEM image of  $\text{FeP-Fe}_3\text{O}_4$ .

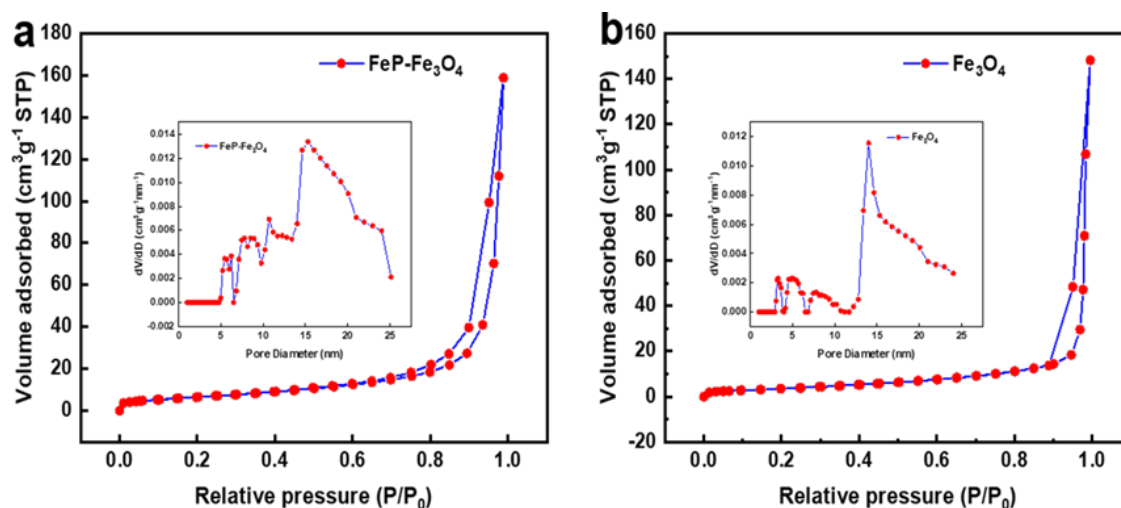

Fig. S13. BET isotherm of (a) FeP-Fe<sub>3</sub>O<sub>4</sub> and (b) Fe<sub>3</sub>O<sub>4</sub>, illustrated with corresponding DFT aperture distribution.

Table S1 The atomic ratios of Fe, P, and O elements

| Name  | At. %  | The ratio of each atom to the carbon atom | Content after removing the carbon atom (%) |
|-------|--------|-------------------------------------------|--------------------------------------------|
| C 1s  | 32.835 | 1                                         |                                            |
| Fe 2p | 9.163  | 0.279                                     | 13.643                                     |
| O 1s  | 47.804 | 1.456                                     | 71.174                                     |
| P 2p  | 10.199 | 0.311                                     | 15.185                                     |

## References

- (1) L. Wang, Z. Lou, J. Deng, R. Zhang, T. Zhang, Ethanol gas detection using a yolk-shell (core-shell)  $\alpha$ -Fe<sub>2</sub>O<sub>3</sub> nanospheres as sensing material, *ACS Appl. Mater. Interfaces*, 2015, 7, 13098-13104.
- (2) J. Zieliński, I. Zglinicka, L. Znak, Z. Kaszukur. Reduction of Fe<sub>2</sub>O<sub>3</sub> with hydrogen, *Appl. Catal. A-Gen.*, 2010, 381, 191-196.
- (3) J. Yu, T. Zhang, Y. Sun, X. Li, X. Li, B. Wu, D. Men, Y. Li. Hollow FeP/Fe<sub>3</sub>O<sub>4</sub> hybrid nanoparticles on carbon nanotubes as efficient electrocatalysts for the oxygen evolution reaction, *ACS Appl. Mater. Interfaces*, 2020, 12, 12783-12792.
- (4) S. Chen, S. Perathoner, C. Ampelli, C. Mebrahtu, D. Su, G. Centi. Electrocatalytic synthesis of ammonia at room temperature and atmospheric pressure from water

and nitrogen on a carbon-nanotube-based electrocatalyst, *Angew. Chem. Int. Ed.*,  
2017, 56, 2699-2703.

(5) G.W. Watt, J.D. Chrisp. Spectrophotometric method for determination of hydrazine,  
*Anal. Chem.*, 1952, 24, 2006-2008.
